# Supplementary material
Source: Springer Nature journal article supplement (https://www.springermedizin.de/resource/supplementary/13014_2010_366_MOESM5_ESM.pdf/9633638)

# Distant disease free survival

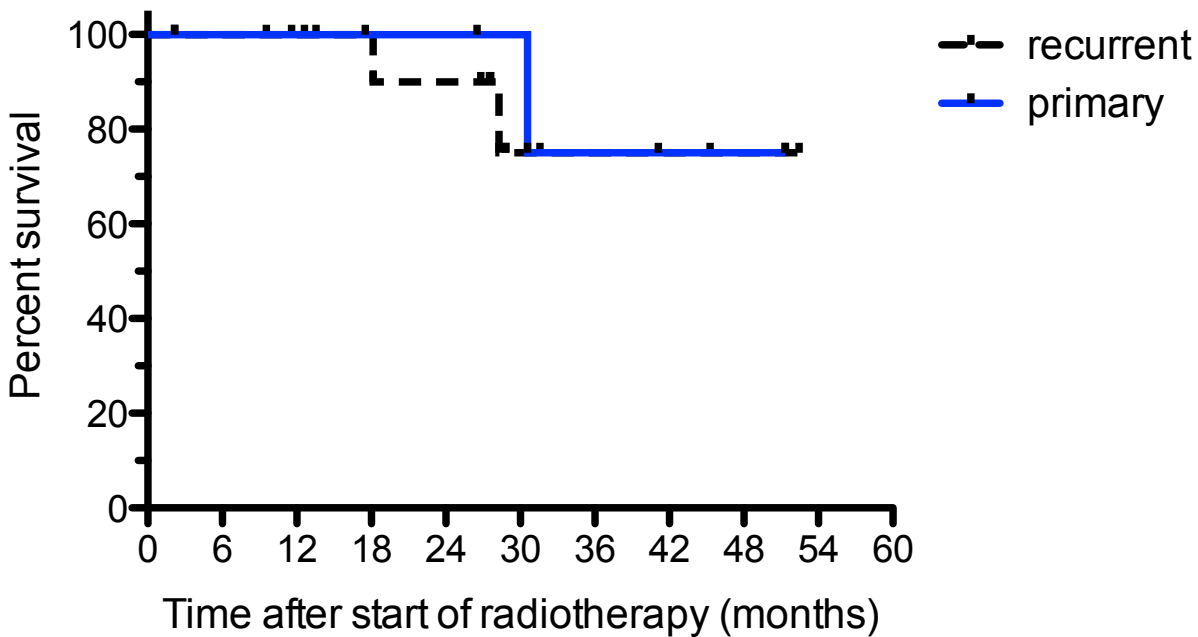

Supplement: MOESM5 [file 9633638]
